# Supplementary material for: Talent Retention of New Generations for Sustainable Employment Relationships in Work 4.0 Era—Assessment by Fuzzy Delphi Method
Source: MDPI journal article supplement (doi:10.3390/su141811535), 2022-09-14
Supplement: s1 [file s1]

Archive with 1 entries (1 files):
- sustainability-1854762-supplementary-final.pdf
